# Supplementary material
Source: PubMed Central journal article supplement (PMC3497433)
Supplement: IAI.00782-12_zii999099928so1.pdf [file IAI.00782-12_zii999099928so1.pdf]

Figure S1

A

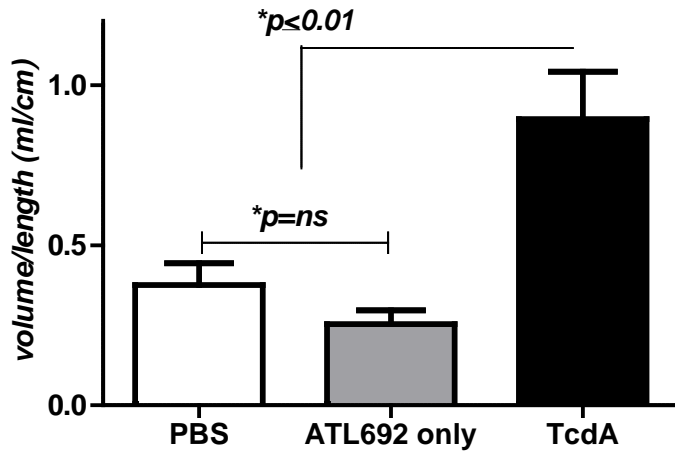

B

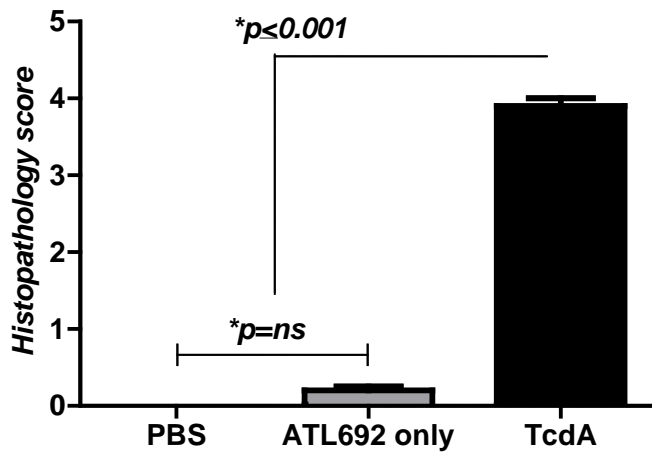

**Figure S1. Effect of ATL 692 alone in rabbit ileal loops.** Rabbit ileal loops (n=5/group) were treated with either PBS, ATL 692 (5 $\mu$ M) alone or TcdA (10  $\mu$ g) alone. **Panel A-** Intestinal secretion measured as volume:length (ml/cm) ((p=0.0013 by ANOVA with Bonferroni's Multiple Comparison Test). **Panel B-** Histopathology scores (p<0.0001 by ANOVA with Bonferroni's Multiple Comparison Test).
